## Proteomic identification of the oncoprotein STAT3 as a target of a novel Skp1 inhibitor

Xin Cheng<sup>1,\*</sup>, Yong-Qiang Liu<sup>1,\*</sup>, Gui-Zhen Wang<sup>1,\*</sup>, Li-Na Yang<sup>2,\*</sup>, Yong-Zhi Lu<sup>3</sup>, Xin-Chun Li<sup>1</sup>, Bo Zhou<sup>1</sup>, Li-Wei Qu<sup>1</sup>, Xiao-Lu Wang<sup>1</sup>, Yong-Xian Cheng<sup>4</sup>, Jinsong Liu<sup>3</sup>, Sheng-Ce Tao<sup>2</sup>, Guang-Biao Zhou<sup>1</sup>

<sup>1</sup>Division of Molecular Carcinogenesis and Targeted Therapy for Cancer, State Key Laboratory of Membrane Biology, Institute of Zoology, Chinese Academy of Sciences, Beijing 100101, China

<sup>2</sup>Shanghai Center for Systems Biomedicine, Key Laboratory of Systems Biomedicine (Ministry of Education), Shanghai Jiao Tong University, Shanghai 200240, China

<sup>3</sup>Guangzhou Institute of Biomedicine and Health, Chinese Academy of Sciences, Guangzhou 510530, China

<sup>4</sup>State Key Laboratory of Phytochemistry and Plant Resources in West China, Kunming Institute of Botany, Chinese Academy of Sciences, Kunming 650201, China

\*These authors have contributed equally to this work

**Correspondence to:** Guang-Biao Zhou, **email:** gzbzhou@ioz.ac.cn  
Sheng-Ce Tao, **email:** taosc@sjtu.edu.cn

**Keywords:** proteome microarray, 6-O-angeloylplenolin, STAT3 inhibitor, Skp2, lung cancer

**Received:** July 25, 2016

**Accepted:** October 14, 2016

**Published:** November 7, 2016

### ABSTRACT

**The S phase kinase-associated protein 1 (Skp1), an adaptor protein of the Skp1-Cul1-F-box protein complex, binds the ubiquitin E3 ligase Skp2 and is critical to its biological functions. Targeting of Skp1 by a small compound 6-O-angeloylplenolin (6-OAP) results in dissociation and degradation of Skp2 and mitotic arrest of lung cancer cells. Here, by using a proteome microarray containing 16,368 proteins and a biotinylated 6-OAP, we identified 99 proteins that could bind 6-OAP, with Skp1 and STAT3 sitting at the central position of the 6-OAP interactome. 6-OAP formed hydrogen bonds with Ser611/Ser613/Arg609 at the SH2 domain of STAT3 and inhibited the constitutive and interleukin-6-induced phosphorylated STAT3 (pSTAT3), leading to inhibitory effects on lung cancer cells and suppression of Skp2 transcription. STAT3 was overexpressed in tumor samples compared to counterpart normal lung tissues and was inversely associated with prognosis of the patients. 6-OAP inhibited tumor growth in SCID mice intravenously injected with lung cancer cells, and downregulated both STAT3 and Skp2 in tumor samples. Given that 6-OAP is a Skp1 inhibitor, our data suggest that this compound may target Skp1 and STAT3 to suppress Skp2, augmenting its anti-lung cancer activity.**

### INTRODUCTION

Lung cancer is the malignant epithelial tumor arising from the respiratory mucosa (bronchi, bronchioles, and alveoli) with complex changes across the genome [1–3]. It is the No. 1 cancer killer worldwide with an only 15% of five-year overall survival rate for all stages combined [4]. Targeted therapies such as epidermal growth factor receptor (EGFR) inhibitors benefit a proportion of patients [5, 6], but will eventually fail because of drug resistance resulting from secondary mutations (e.g., T790M) in EGFR or other mechanisms [7]. The efficacy of immune

checkpoint inhibitors is promising, and the long-term efficacy is under investigation [8, 9]. To further improve clinical outcome, combinatory treatment regimens or drugs perturbing multiple targets are desired [10, 11]. For example, arsenic trioxide which achieves a 5-year overall survival of more than 90% in acute promyelocytic leukemia when used in combination with retinoic acid, targets PML-RAR $\alpha$  fusion protein, hexokinase-2, and binds 360 proteins [12, 13].

Cell cycle, the sequence of cellular transformations that accompany transition from one mitotic cell division to another, is a critical regulator of cell growth, proliferation

and survival, and is stringently controlled by two types of E3 ligase complexes, the anaphase-promoting complex (APC) and the Skp1-Cullin-F-box protein (SCF) complex [14]. Termination of mitotic progression by microtubule inhibitors such as taxanes represents one of the most successful therapeutic approaches in cancer, but severe side effects and development of drug resistance limit their clinical use [15, 16]. To bypass these limitations, novel anti-mitotic strategies, e.g., suppression of Skp2 and Cdc20, have been investigated [17–19]. We recently showed that sequestration of Skp1 by occupying the sites critical to Skp1-Skp2 interaction by a natural compound 6-*O*-angeloylplenolin (6-OAP), caused dissociation and proteolysis of oncogenic E3 ligases Skp2, NIPA, and  $\beta$ -TRCP, and accumulation of their substrates Cyclin B1, P27 and E-Cadherin. 6-OAP induced mitotic arrest and exerted potent anti-lung cancer and anti-myeloma activity in murine models with low adverse effect and favorable pharmacological features [20, 21], suggesting the significant therapeutic potentials of this medicinal herb-derived natural compound.

In this study, we used a biotinylated 6-OAP (Bio-6-OAP) and a proteome microarray containing 16,368 proteins to systematically identify the direct targets of this compound. The results showed that 6-OAP bound 99 proteins with Skp1 and Signal transducer and activator of transcription 3 (STAT3) sitting at the central position of the signal network. 6-OAP inhibited constitutively activated- and IL-6-induced STAT3 activity, and suppressed STAT3-dependent *Skp2* transcription. Therefore, 6-OAP inhibited both Skp1 and STAT3 to repress Skp2, exhibiting inhibitory effects on lung cancer cell proliferation and survival.

## RESULTS

### Proteomic identification of 6-OAP binding proteins

To uncover 6-OAP binding proteins, Bio-6-OAP (Figure 1A) was synthesized [20] and a human proteomic microarray containing 16,368 affinity purified N-terminal GST tagged proteins [22] was employed. Bio-6-OAP retained the anti-lung cancer activity and the mechanism of action of 6-OAP [20]. Bio-6-OAP or biotin was probed on the human proteome microarray, and after free Bio-6-OAP/biotin was removed, the microarray was further incubated with a Cy3 conjugated streptavidin (Cy3-SA) to present the Bio-6-OAP-protein interactions, and the specific binding between biotin and streptavidin was used for readout (Figure 1B). Two randomly picked blocks from the same location of both the experimental and control microarrays were compared and positive spots were identified (Figure 1C). The signal to noise ratio (SNR) for each spot was defined as the ratio of (median foreground minus median background) to

standard deviation of median background, and the SNR of a protein was averaged from the two duplicated spots on each microarray. To call the candidates, the cutoff was set as  $SNR \geq 2$ , and after removal of nonspecific signal as compared to the vehicle control, 99 proteins were identified as potential target proteins of Bio-6-OAP (Supplementary Table S1). Representative spots of candidate proteins were shown in Figure 1D.

### Identification of SKP1 and STAT3 as key targets of 6-OAP

The 6-OAP targeting proteins was analyzed by using DAVID bioinformatics resources [23], and the results showed that the candidates were substantially enriched in cellular response to stress, JNK cascade, stress-activated protein kinase and intracellular signaling cascade (Supplementary Figure S1A). For molecular function, the most significant ones ( $P < 0.01$ ) were catalytic activity, protein binding and transferase activity (Supplementary Figure S1B). Pathway analysis was performed using the KEGG (Kyoto Encyclopedia of Genes and Genomes) analysis, and the results showed that molecules in cell cycle (SKP1, CDKN1B, MCM7, CCNH), leukocyte transendothelial migration (PXN, OCLN, PTPN11, PECAM1), chronic myeloid leukemia (PTPN11, CRKL, CDKN1B), adipocytokine signaling pathway (PTPN11, STAT3, MAPK9), and Jak-STAT signaling pathway (STAT3, PTPN11, PTPN6, CNTFR) were mostly significantly perturbed (Figure 1E). The 6-OAP interactome for highly-connected regions was analyzed by using a Cytoscape plugin MCODE [24], and prominent, highly-connected clusters formed by several complexes and cellular functions were revealed (Supplementary Figure S1C). Interestingly, proteins related to SKP1 and STAT3 are connected in a dense protein-protein interaction network that forms the densest cluster (Cluster 1) (Supplementary Figure S1C and Figure 1F), suggested that SKP1 and STAT3 may be the most important targets of 6-OAP.

### STAT3 is a direct target of 6-OAP

The above results confirmed our previous finding that SKP1 is a direct target of 6-OAP which binds Skp1 at sites critical to Skp1-Skp2 interaction, leading to dissociation and proteolysis of oncogenic E3 ligases NIPA, Skp2, and  $\beta$ -TRCP, and accumulation of their substrates Cyclin B1, P27 and E-Cadherin [20]. In this work, STAT3 was selected as a protein of interest for further investigation. To confirm 6-OAP/STAT3 interaction, the H1975 cells were treated with Bio-6-OAP for 6 hours, lysed, and proteins were subjected to Western blot assay. We found that STAT3, but not STAT5, was pulled down by streptavidin agarose (Figure 2A), suggesting the binding between 6-OAP and STAT3. Moreover, the binding of

Bio-6-OAP with STAT3 could be attenuated markedly by the competition of unlabeled 6-OAP (Figure 2B).

Computational modeling of 6-OAP/STAT3 interaction showed that this compound binds STAT3 at its Src homology-2 (SH2) domain (Figure 2C) which is required for phosphorylation and dimerization of STAT3 [25]. SH2 domain had been shown to be targeted by a small compound S31-201 which forms hydrogen bonding with Lys-591, Ser-611, Ser-613, and Arg-609 [26]. We found that 6-OAP binds SH2 by forming hydrogen bonds with Ser611, Ser613 and Arg609 (Figure 2D, E). To confirm the significance of SH2 and S611/S613/R609 in binding with 6-OAP, expression plasmids of *STAT3* with SH2 domain depletion (*STAT3* $\Delta$ SH2) or mutations in Ser611/Ser613/Arg609 (S611A/S613A/R609A; designated mSTAT3) were constructed and transfected into 293 cells which were treated with Bio-6-OAP for additional 6 hours. The cells were then lysed and the lysates were incubated with Streptavidin (SA)-agarose and detected by Western

blot. We found that while the wild type STAT3 showed high binding affinity with Bio-6-OAP, deletion of SH2 or mutations in S611/S613/R609 markedly attenuated the binding affinity (Figure 2F).

### 6-OAP inhibits constitutive and interleukin-6 (IL-6)-induced STAT3 activity

STAT3 is a transcription factor that regulates genes involved in cell growth, proliferation, and survival, and is activated by phosphorylation by upstream Janus activated kinases (JAKs) and the interleukin (IL)-6 family cytokines and is inactivated by dephosphorylation [27, 28]. We tested the effect of 6-OAP on STAT3 phosphorylation, and found that this compound inhibited phosphorylation of STAT3 (at Tyr705 but not Ser727) in a dose- and time-dependent manner in H1975 and A549 cells (Figure 3A, B). In A549 cells, treatment with IL-6 at 10 ng/ml for 1 hour up-regulated pSTAT3,

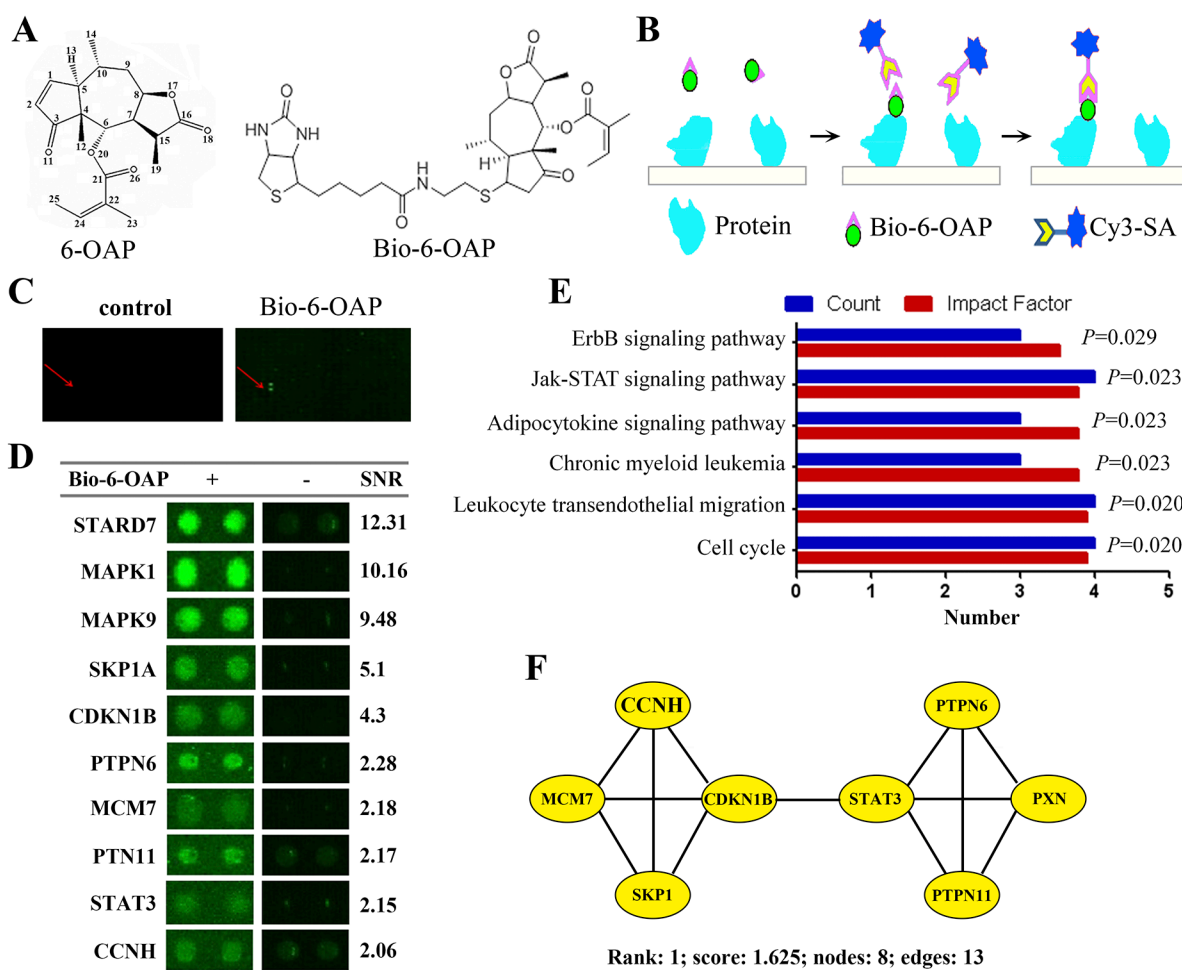

**Figure 1: Identification of 6-OAP binding proteins.** **A.** Chemical structure of 6-OAP and Bio-6-OAP. **B.** A schematic representation of identification of Bio-6-OAP binding protein using a proteome microarray and Bio-6-OAP. **C.** Images of two randomly picked blocks from the same location of both the biotin control (left) and the experimental microarrays (right). **D.** Images of 10 representatives of Bio-6-OAP binding proteins in the proteome microarray. **E.** KEGG analysis of pathways in 6-OAP binding proteins. **F.** The representative 6-OAP interactome. Proteins related to SKP1 and STAT3 are connected in a dense protein-protein interaction network that forms the densest cluster.

while incubation with 6-OAP at 5 to 10  $\mu\text{M}$  for 3 hours markedly antagonized this effect (Figure 3C). In line with these observations, pretreatment with 6-OAP at 7.5  $\mu\text{M}$  for 3 hours (and then washed out the drug) drastically slowed down or inhibited IL-6 (10 ng/ml)-induced phosphorylation of STAT3 (Figure 3D).

To test the effect of 6-OAP on STAT3 transcriptional activity, A549 cells were transfected

with the reporter plasmid pAPRE-luciferase (containing STAT3-specific binding element APRE [29]) and treated with 6-OAP for 24 hours, and luciferase reporter assays were performed. We found that 6-OAP at 7.5  $\mu\text{M}$  suppressed the luciferase activity of up to 85% (Figure 3E). Moreover, while IL-6 (10 ng/ml) significantly increased STAT3 transcriptional activity, 6-OAP antagonized this effect (Figure 3F).

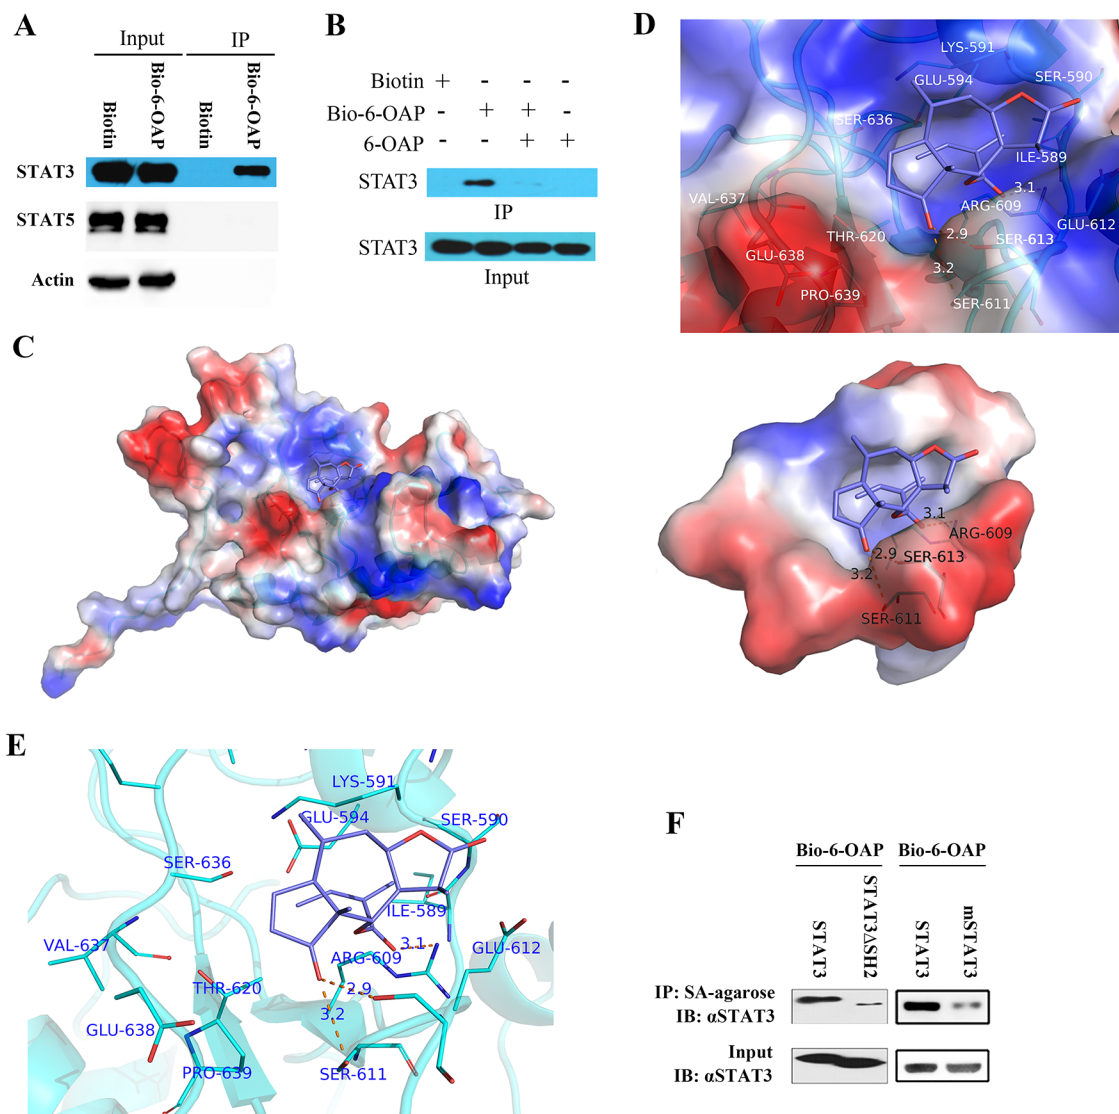

**Figure 2: STAT3 is a direct target of 6-OAP.** **A.** H1975 cells were treated with Biotin or Bio-6-OAP at 50  $\mu\text{M}$  for 6 hours, lysed, and the cell lysates were subjected to immunoprecipitation using streptavidin agarose and Western blot using indicated antibodies. **B.** H1975 cells were treated with Bio-6-OAP (50  $\mu\text{M}$ ) in the presence or absence of 6-OAP (100  $\mu\text{M}$ ) for 6 hours, lysed, and the cell lysates were subjected to immunoprecipitation using streptavidin agarose and Western blot. **C-E.** Computational modeling of 6-OAP docking to the SH2 domain of Stat3. (C) STAT3 and 6-OAP are shown as cartoon and sticks, respectively. Solvent-accessible surface of SH2 domain is shown. It is color coded according to the electrostatic potential, with red and blue indicating negative and positive, respectively. (D) Solvent-accessible surface of SH2 domain is shown color-coded according to the electrostatic potential, with red and blue indicating negative and positive, respectively. SH2 domain and 6-OAP are shown as cartoon and sticks, respectively. Hydrogen bonds binding to S611, S613 and R609 are shown as dash lines. (E) Interaction between 6-OAP and the SH2 domain of STAT3 (PDB code: 1BG1). SH2 domain was shown as cartoon; 6-OAP and residues at active site were shown as sticks. **F.** The 293T cells were transfected with SH2 domain-deleted STAT3 (STAT3ASH2) or STAT3 with S611A/S613A/R609A mutations (mSTAT3), treated with 50  $\mu\text{M}$  Bio-6-OAP for 6 hours, lysed, the lysates were subjected to immunoprecipitation using streptavidin (SA) agarose and Western blot using indicated antibodies.



## Transcriptional suppression of STAT3 target gene *Skp2*

A previous study demonstrated that *Skp2* is a target of STAT3 [30], and our previous work showed that *Skp2* is dissociated from *Skp1* and underwent proteolysis in lung cancer cells treated with 6-OAP [20]. We tested the effect of 6-OAP on *Skp2* expression at mRNA level, and reported that in A549 and H1975 cells 6-OAP at 7.5  $\mu$ M significantly inhibited *Skp2* expression in a time-dependent manner (Figure 4A). In A549 cells, IL-6 (10 ng/ml) up-regulated pSTAT3 whereas 6-OAP suppressed this up-regulation at both protein and mRNA levels (Figure 4B). We found that IL-6 also induced upregulation of *Skp2*, which was suppressed by 6-OAP (Figure 4B). In 293T cells transfected with pGL3-*Skp2* reporter plasmid, 6-OAP inhibited *Skp2* luciferase activity; exogenous STAT3 significantly increased *Skp2* luciferase activity, whereas 6-OAP antagonized this phenomenon (Figure 4C). In a chromatin immunoprecipitation (ChIP) assay using an anti-STAT3 antibody, we showed that *Skp2* was enriched by STAT3 in A549 cells, whereas 6-OAP repressed STAT3-*Skp2* binding affinity (Figure 4D). We further showed that in cells transfected with siNC, treatment with 6-OAP at 7.5  $\mu$ M for 24 hours induced downregulation of *Skp2*, whereas silencing of STAT3 by siRNA enhanced 6-OAP-caused downregulation of *Skp2* at both protein (Figure 4E) and mRNA (Figure 4F) levels.

## The expression of STAT3 and *Skp2* in lung cancer

We tested the expression of STAT3 in several cell lines by Western blot, and found that the expression of

pSTAT3 in lung cancer lines (SPC-A-1, EKVX, HCC827, H1975, H292, A549, 95D, and L78) was higher than in normal bronchial epithelial (HBepiC, Beas-2B, 16HBE) or lung fibroblast (HLF) cell lines (Figure 5A). In 18 previously untreated NSCLCs the expression of pSTAT3 was also significantly higher in tumor samples than their adjacent normal lung tissues in 8 (44.4%) patients (Figure 5B, C). In 3 studies documented in Oncomine data base [31–33], the expression of *STAT3* at mRNA level (detected by microarray) in tumor samples was significantly higher than in counterpart normal lung tissues (Figure 5D). We further tested the potential relationship between the *STAT3* expression and life span of the patients using data deposited in a website (<http://kmplot.com/analysis/index.php?p=service&start=1>) [34], and found that the expression of *STAT3* was inversely associated with survival of patients with lung adenocarcinoma (Figure 5E). In works of Oncomine data base [32, 33, 35–39], the expression of *Skp2* at mRNA level in tumor samples was significantly higher than in counterpart normal lung tissues (Figure 5F). In gene expression profiles and survival data base deposited in a website (<http://kmplot.com/analysis/index.php?p=service&start=1>) [34], the expression of *Skp2* was inversely associated with overall survival of NSCLC patients (Figure 5G).

## 6-OAP inhibits STAT3 and suppresses lung cancer in vivo

6-OAP is a cell cycle inhibitor that arrests mitosis [20, 21]. Here we showed 6-OAP also moderately induced apoptosis in lung cancer cells. Treatment with 6-OAP at 7.5  $\mu$ M for 24 hours resulted in apoptosis in 18% of A549 and 27% of H1975 cells (Figure 6A). In these cells, the

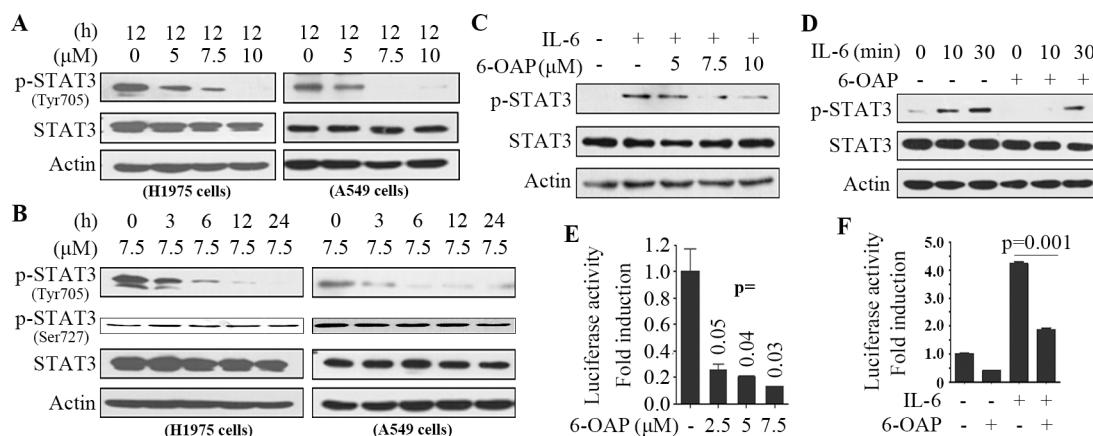

**Figure 3: 6-OAP is a STAT3 inhibitor.** **A.** The cells were treated with 6-OAP at indicated concentrations for 12 hours, lysed, and Western blot was performed using indicated antibodies. **B.** The cells were treated with 6-OAP at 7.5  $\mu$ M for indicated time points, lysed, and Western blot was performed. **C.** A549 cells were serum starved for 6 hours, treated with IL-6 at 10 ng/ml for 1 hour, followed by treatment with 6-OAP for 3 hours, lysed, and Western blot was performed. **D.** A549 cells were pretreated with 6-OAP at 7.5  $\mu$ M for 3 hours, followed by stimulation with IL-6 at 10 ng/ml for indicated time points. Whole-cell extracts were examined by Western blot. **E.** Luciferase assays were performed using A549 cells transfected with pAPRE-luc and pRL-CMV (as an internal control), and treated with 6-OAP for 24 hours. **F.** A549 cells were transfected with pAPRE-luciferase and pRL-CMV, serum starved for 6 hours, and treated with 6-OAP (7.5  $\mu$ M) or IL-6 (30 ng/ml) for 24 hours, and relative luciferase activities were normalized with the internal control.

apoptosis suppressors Bcl-2 was downregulated whereas Caspase-3 was activated by 6-OAP treatment (Figure 6B). In A549 cells treated with 6-OAP, the exogenous STAT3 partially rescued 6-OAP-induced programmed cell death (Figure 6C), suggesting a role of STAT3 inhibition in 6-OAP-induced apoptosis. We further showed that in a wound-healing experiment, 6-OAP inhibited lung cancer cells to migrate into the wound gap (Figure 6D, E), and suppressed cell migration in a transwell chamber migration assay (Figure 6F).

We showed that in SCID mice injected with A549-luciferase cells ( $1 \times 10^6$ ) via tail vein, treatment with 10 mg/kg 6-OAP (once every two days for 30 days) significantly suppressed tumor growth (Figure 6G, H), in consistent with our previous report that 6-OAP (20 mg/kg) significantly suppressed tumor growth in SCID mice bearing A549-luciferase cells and in nude mice subcutaneously inoculated with H1975 cells [20]. We tested the effect on 6-OAP on STAT3 *in vivo* by Western blot analysis of lysates of tumor samples isolated from the mice, and found that treatment with 10 mg/kg 6-OAP drastically inhibited pSTAT3 in tumor samples (Figure 6I). 6-OAP at 10 – 20 mg/kg also repressed pSTAT3 in tumor samples of nude mice inoculated with H1975 cells (Figure 6J). Moreover, 6-OAP downregulated Skp2 at both mRNA and protein levels in these samples (Figure 6I, J).

## DISCUSSION

STAT3, a member of the STATs family that regulates gene transcription through relaying signals from activated plasma membrane receptors to the nucleus, is activated by the phosphorylation of Tyr705 by upstream kinases such as JAK2 and the subsequent formation of dimerization of STAT3 monomers via their SH2 domains [40, 41]. STAT3 acts as an oncogene [42] and promotes proliferation, survival [43], angiogenesis, and metastasis [44], and interferes with apoptosis and anti-tumor immune responses [28]. Constitutive activation of STAT3 has been demonstrated in most human cancers including breast cancer [45], leukemia and lymphoma [46], multiple myeloma [47], and gastric cancer [48], and is associated with a poor prognosis in colorectal cancer [49], gastric cancer [50], and ovarian cancer [51]. STAT3 is persistently activated in about 50% of NSCLCs, especially in adenocarcinomas harboring activating mutations in EGFR which activate the gp130/JAK/STAT3 pathway by means of IL-6 upregulation [52, 53]. We showed that in 8/18 (44.4%) NSCLCs, pSTAT3 was higher in tumor samples than in counterpart normal lung tissues (Figure 5B, C). Moreover, *STAT3* high expression was inversely associated with poor prognosis of the patients (Figure 5D). These results suggest that STAT3 may have an important role in lung carcinogenesis.

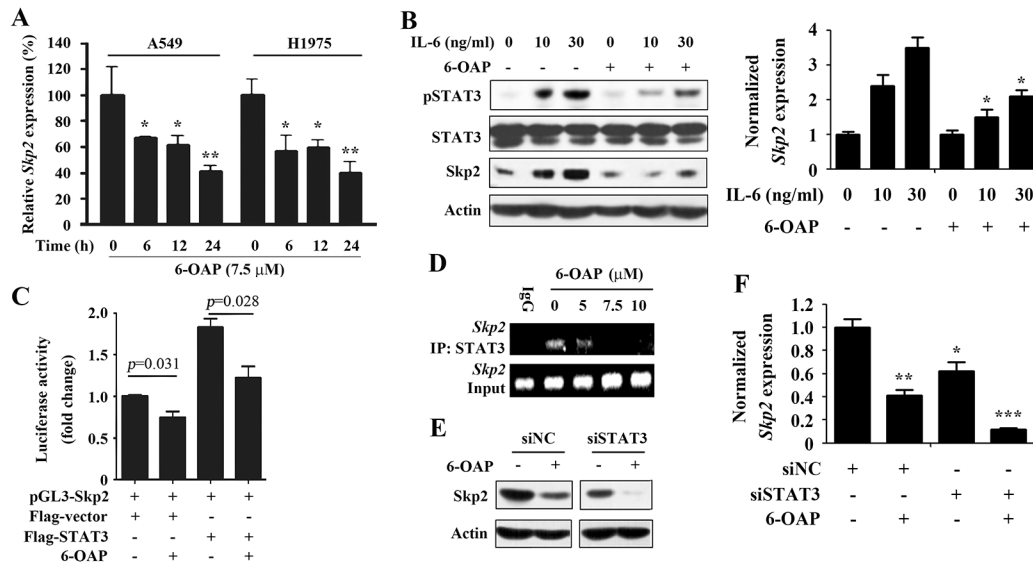

**Figure 4: Inhibition of STAT3 mediates 6-OAP-induced suppression of *Skp2* transcription.** A. A549 and H1975 cells were treated with 6-OAP at 7.5  $\mu$ M for indicated time points, lysed, and the expression of *Skp2* was detected by real-time RT-PCR. B. A549 cells were serum starved, pretreated with 6-OAP at 7.5  $\mu$ M for 3 hours (then washed out the drug), followed by stimulation with IL-6 at 10 – 30 ng/ml for 1 hour. The cells were lysed, and *Skp2* expression was examined by Western blot (left) and real-time RT-PCR (right). \*,  $P < 0.05$ . C. Luciferase assays using 293T cells expressing Flag-STAT3 and/or pGL3-Skp2 reporter and pRL-TK (as an internal control), with or without 6-OAP treatment (7.5  $\mu$ M for 24 hours). D. A549 cells were treated with 6-OAP for 24 hours, lysed, and chromatin immunoprecipitation (ChIP) assay was performed using an anti-STAT3 antibody and *Skp2* expression was detected by RT-PCR. E, F. A549 cells were transfected with siNC or siSTAT3 for 24 hours, and treated with or without 6-OAP (at 7.5  $\mu$ M for 24 hours). The cells were lysed and the expression of *Skp2* was tested by Western blot (E) and real-time RT-PCR (F). \*,  $P < 0.05$ ; \*\*,  $P < 0.01$ ; \*\*\*,  $P < 0.001$ .

STAT3 is an attractive therapeutic target for both the early stages and metastatic disease. STAT3 inhibition strategies include inhibition of the STAT3 DNA binding domain, abrogation of the STAT3 N-terminal domain, suppression of the STAT3 SH2 domain, inhibition of the STAT3-importin interaction, and blockage of upstream kinase activity [28]. We showed that 6-OAP could bind the SH2 domain by forming hydrogen bonds with Ser611/Ser613/Arg609 (Figure 3C–3E), whereas depletion of SH2 domain or mutations in Ser611/Ser613/Arg609 abrogated STAT3-6-OAP interaction (Figure 3F). 6-OAP inhibited constitutively activated STAT3, suppressed IL-6-induced pSTAT3 (Figure 3), and triggered apoptosis and suppressed migration of lung cancer cells *in vitro* (Figure 6) and

showed potent anti-lung cancer activity *in vivo* (Figure 6) [20]. In a rescue assay, exogenous expression of STAT3 partially suppressed 6-OAP-induced apoptosis of the cells (Figure 6C), suggesting that inhibition of STAT3 at least partially mediated the anti-lung cancer effect of 6-OAP.

High-throughput proteomic approach provides a powerful tool to systematically identify the targets of anti-cancer drugs. Using the proteomic microarray containing 16,368 proteins, 360 proteins that specifically bind arsenic were unveiled [13], indicating the significant capability of this method. Here by using this proteomic microarray and Bio-6-OAP, 99 candidate targets of 6-OAP were identified. Skp1 which has been shown to be a direct target of 6-OAP [20], was found to be one of the two key targets of this

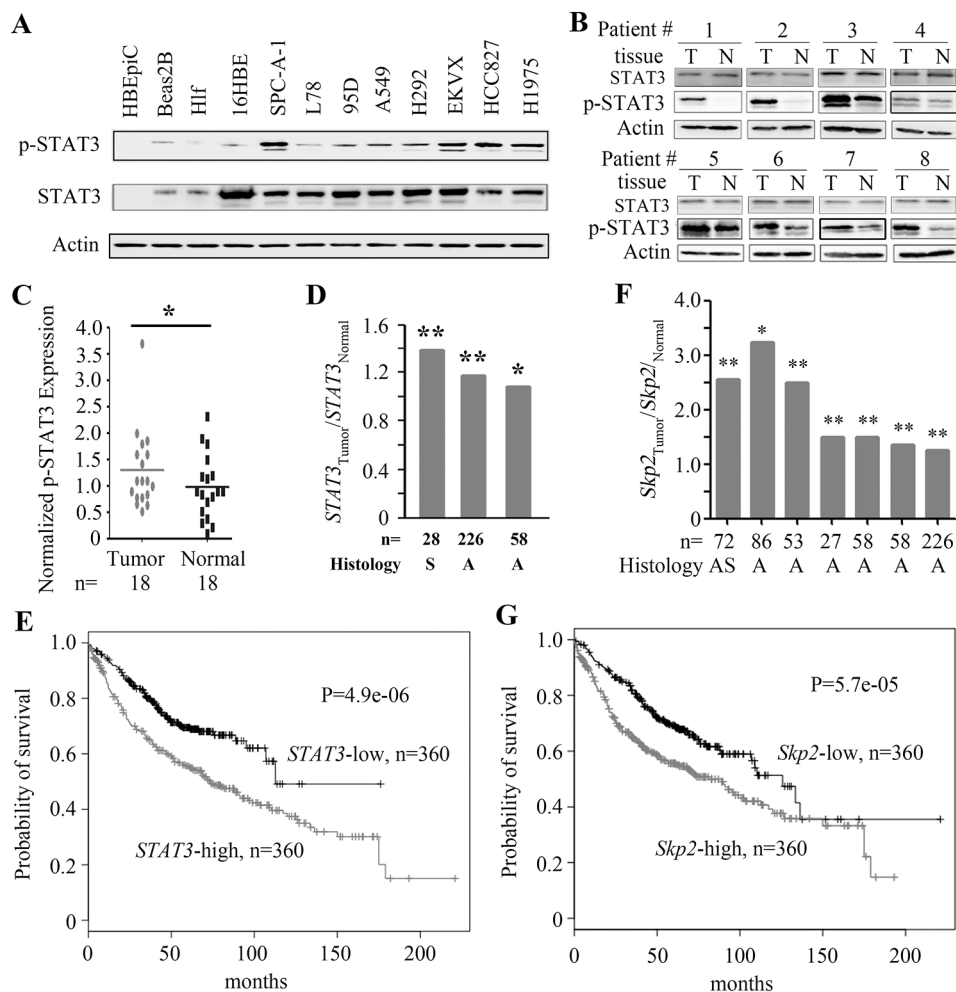

**Figure 5: The expression of STAT3 and Skp2 in lung cancer.** **A.** STAT3 in normal and cancerous cells was detected by Western blot. **B, C.** The expression of pSTAT3 in tumor and counterpart normal lung tissues isolated from NSCLCs was tested by Western blot (B) and the results were further evaluated by densitometry analysis (C). **D.** STAT3 expression was detected by microarrays in tumor samples and normal lung tissues. The data were obtained from the Oncomine database. S, Squamous cell carcinoma; A, Adenocarcinoma. **E.** Overall survival of the adenocarcinoma patients with high or low level STAT3. The data were obtained from a database at <http://kmplot.com/analysis/index.php?p=service&cancer=lung>, and the expression of STAT3 was detected by microarray. **F.** Skp2 expression in NSCLCs, detected by microarray. The data were obtained from the Oncomine database. **G.** Overall survival of NSCLC patients with high or low level Skp2. The data were obtained from a database at <http://kmplot.com/analysis/index.php?p=service#x0026;cancer=lung>, and the expression of Skp2 was detected by microarray. \*, P<0.05; \*\*, P<0.01; \*\*\*, P<0.001.

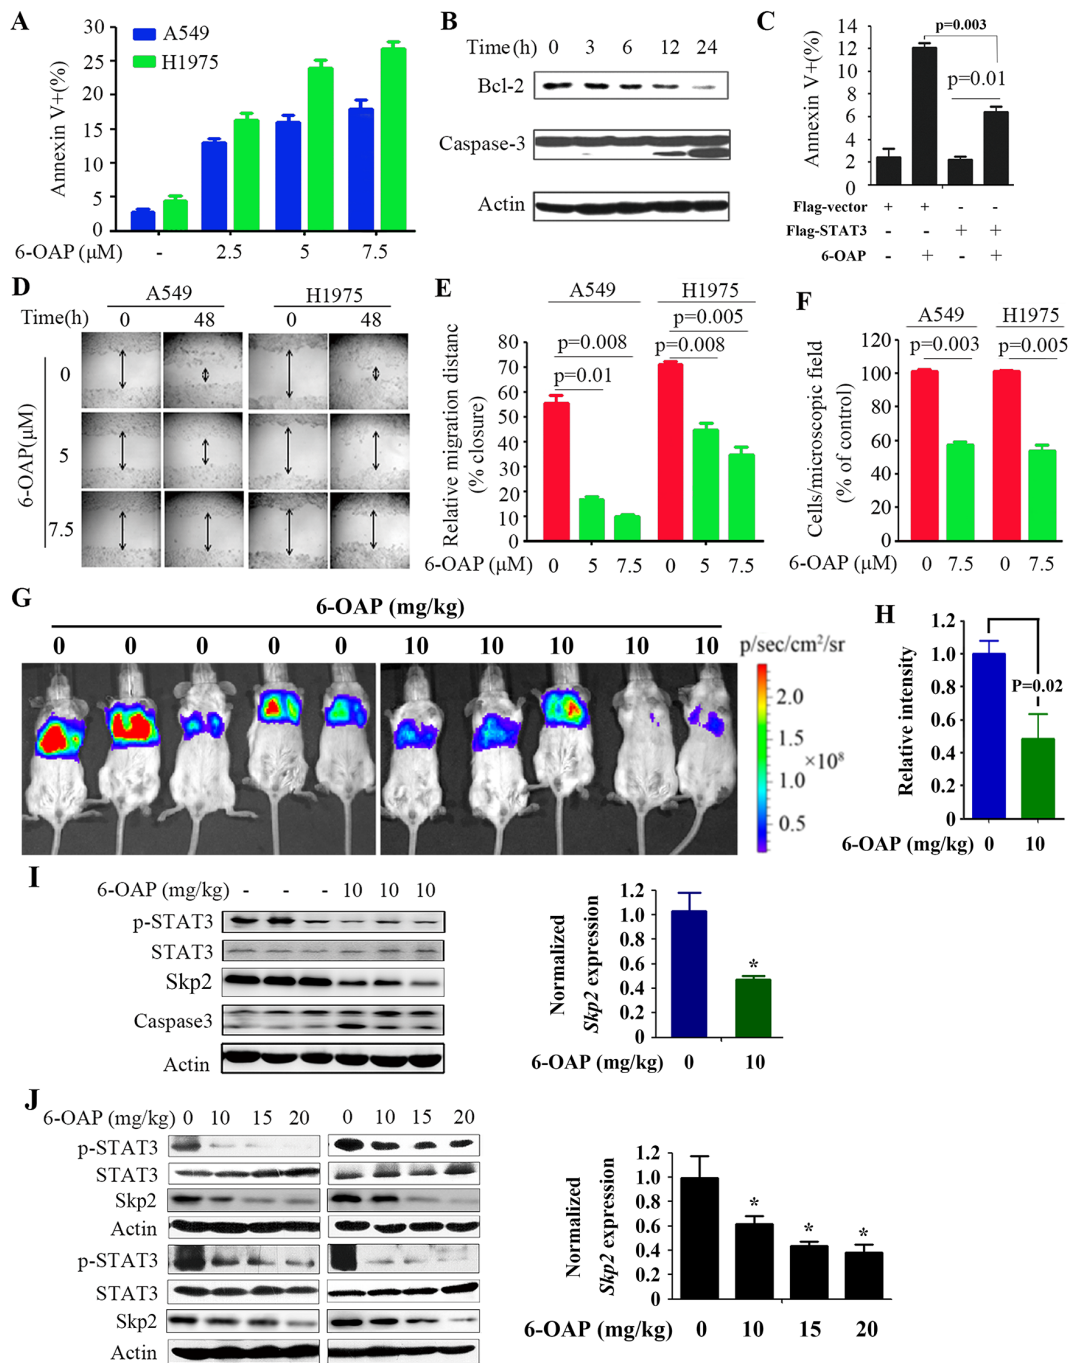

**Figure 6: Inhibitory effects of 6-OAP on lung cancer cells *in vitro* and *in vivo*.** A. A549 and H1975 cells were treated with 6-OAP at indicated concentrations for 24 hours. The cells were analyzed by Annexin V/propidium iodide (PI) staining and flow cytometry. B. H1975 cells were treated with 6-OAP at 7.5 μM for indicated time points, lysed, and Western blot was performed. C. H1975 cells were transfected with flag-STAT3 or vector control, and 24 hours later treated with 6-OAP. The cells were analyzed by Annexin V/PI staining and flow cytometry. D, E. Wound healing assays of A549 and H1975 cells upon 6-OAP treatment. Cultures were imaged and visualized at 10× magnification by light microscopy (D). Data represent the means ± SD from three independent experiments (E). F. Results of transwell assays. The cells were seeded into transwell chambers and treated with 6-OAP. After 24 hours, migrated cells stained with 0.1% crystal violet were counted. Data represent the means ± SD from three independent experiments. G. A549-Luciferase cells were intravenously injected into SCID mice, and 1 week later the mice were randomized to receive vehicle (n = 6) or 6-OAP treatment (n = 8). The mice were detected by IVIS Spectrum. H. The relative luciferase intensity in the mice. I. Western blot (left) and real-time RT-PCR (right) analyses were performed using lysates of tumor samples isolated from the SCID mice. J. Western blot (left) and real-time RT-PCR (right) analyses were performed using lysates of tumor samples isolated from the nude mice subcutaneously inoculated with H1975 cells. \*, P<0.05.



compound (Figure 1F), demonstrating the reproducibility and specificity of this strategy. Therefore, the proteomic approaches in combination with labeling technology will be helpful to uncover the direct targets of most compounds, including those once thought to have single or limited targets.

There is growing interest in developing therapies targeting SCF complexes which are multi-protein E3 ubiquitin ligase complexes catalyzing the ubiquitination and degradation of a variety of proteins. Skp2 is frequently overexpressed in many human cancers and plays a key role in tumorigenesis, whereas inhibition of Skp2 functions (either proteolytic function or non-proteolytic function) is emerging as a promising and novel anti-cancer strategy [54]. Recent studies showed that Skp1 was overexpressed in NSCLCs and was associated with poor prognosis [20]. Abnormal Skp1 was also found in breast cancers [55]. Targeting Skp1 by engineered ubiquitin variants at the Skp1–F-box interface for Cul1 binding site inhibit SCF ubiquitin ligases [56]. We showed that 6-OAP sequesters Skp1 and dissociates Skp2, leading to proteolysis of the oncoprotein [20, 57]. Inactivation of STAT3 by 6-OAP also resulted in transcription suppression of *Skp2* (Figure 4), enhancing the inhibitory effect of 6-OAP on Skp2 to suppress lung cancer. These results indicate that a small compound can target multiple molecules to modulate signal cascade, contributing to its anti-cancer activity.

6-OAP is a sesquiterpene lactone extracted from a medicinal herb *Centipeda minima* (L.) which is rich in some East and South East Asia countries such as China, Korea, and Nepal [58]. *Centipeda minima* is a *Compositae* plant used by Chinese and Korea people as folk medicine to treat headache, cough, expectoration, nasal allergy, diarrhea, malaria, and asthma [20, 21]. 6-OAP exhibits inhibitory effects on human lung, colorectal, liver, stomach, skin cancer, and multiple myeloma cells, and shows low adverse effect and favorable pharmacological features [20, 21, 59]. Therefore, the anti-lung cancer efficacy of 6-OAP or its parental plant *Centipeda minima*, should be tested in clinical investigations.

## MATERIALS AND METHODS

### Chemicals and reagents

6-OAP was isolated from *Centipeda minima* by our chemistry group, and the purity of this compound reached 99.5% [59]. Labeling of 6-OAP was performed by Boshixing Synthetic Technologies, Inc. (Shenzhen, Guangdong, China) as described [20]. 6-OAP was dissolved in DMSO (Sigma-Aldrich, St. Louis, MO, USA) at a stock solution of  $10^{-2}$  M and stored at  $-20^{\circ}\text{C}$ . IL-6 was purchased from R&D Systems, Inc. (Minneapolis, MN, USA). The 3-(4, 5-Dimethylthiazol-2-yl)-2, 5-diphenyltetrazolium bromide (MTT) was purchased from Amresco Inc. (Solon, OH, USA). Biotin was obtained from Sigma-Aldrich.

### Antibodies

The antibodies used in this study were as follows: anti-pSTAT3 (Tyr705), anti-pSTAT3 (Ser727), anti-STAT3, anti-STAT5, anti-Caspase-3, goat anti-rabbit IgG-HRP and goat anti-mouse IgG HRP antibody (Cell Signaling Technology, Beverly, MA, USA); anti-Skp2, anti-Bcl-2 (Santa Cruz Biotechnology, Santa Cruz, CA, USA); anti-Flag M2, and anti- $\beta$ -Actin (Sigma) antibodies.

### Cell culture

The lung cancer cell lines NCI-H1975, NCI-292, HCC827, A549 and human embryonic kidney HEK-293 cells were obtained from the American Tissue Culture Collection (ATCC, Manassas, VA, USA) and Human normal bronchial epithelial cell line 16HBE was purchased from the Cell Resource Center, Chinese Academy of Medical Sciences (Beijing). Normal human bronchial epithelial cells (HBepiC, Catalog Number: 3210) were purchased from ScienCell (ScienCell Research Laboratories, San Diego, CA, USA). Human lung squamous carcinoma cell lines L78 and highly metastatic large-cell lung cancer cell lines 95D were obtained from the Cell bank of Chinese Academy of Sciences (Shanghai), and human embryonic lung fibroblast HLF cells were purchased from Kenqiang Instrument Co., Ltd (Shanghai). BEAS-2B bronchial epithelial cells were provided by Professor Hongbin Ji at Shanghai Institute for Biological Sciences, Chinese Academy of Sciences. A549, HLF and BEAS-2B cells were cultured in Dulbecco modified Eagle medium (DMEM) containing 10% fetal bovine serum (FBS; Gibco/BRL, Grand Island, NY), 100 U/ml penicillin, 100 mg/ml streptomycin. HBepiC cells were cultured in a serum-free Bronchial Epithelial Cell Medium (BECM, Cat. No. 3211, ScienCell Research Laboratories) containing essential and non-essential amino acids, vitamins, hormones, growth factors and trace minerals. L78, 95D, HCC827, NCI-292, NCI-H1975 and 16HBE cells were cultured in RPMI 1640 supplemented with 10% fetal bovine serum (FBS; Gibco/BRL, Grand Island, NY), 100 U/ml penicillin, 100 mg/ml streptomycin.

### Assessment of cell proliferation, apoptosis and cell cycle

Cancer cells ( $5 \times 10^3$ ) were cultured in each well of 96-well tissue culture plates (Coaster, Charlotte, NC) and incubated without or with 6-OAP/Bio-6-OAP for indicated concentrations at  $37^{\circ}\text{C}$  in a 5%  $\text{CO}_2$  atmosphere. MTT assay was performed as described [60]. The data were calculated using the Graphpad Prism software (version 5.01, Graphpad software, Inc., California, USA). Cell apoptosis was measured using Annexin V/PI Apoptosis Detection kit (BD Biosciences, San Jose, CA) according

to the manufacturer's instructions. Cell cycle distribution was analyzed by flow cytometry (BD FACS Vantage Diva, USA) and CellQuest software (BD Biosciences, San Jose, CA).

### **Cell migration assays and wound healing assay**

Transwells with 8- $\mu$ M pores were incubated at 37°C in a CO<sub>2</sub> incubator for at least 1 hour. A549 and H1975 were added to the upper chamber and allowed to migrate for 24 hour. Cells on the inserts were fixed with 90% ethanol, stained with 0.0005% Gentian Violet Solution, and washed with PBS. Non-migrated cells on the upper side of the inserts were wiped off with a cotton swab. Migrated cells were counted in five microscopic fields at 4 $\times$  magnification, and the counts were averaged.

### **Proteome microarray assay and data analysis**

Human proteome microarray fabrication was carried out as previously described [13]. Proteome microarrays were blocked with blocking buffer; Bio-6-OAP or biotin was diluted to 50  $\mu$ M in blocking buffer and incubated on the blocked proteome microarray. The washed microarrays were incubated with Cy3-Streptavidin at 1:1000 dilution (Sigma, St Louis, MO), washes and spun dry and subjected for scanning with a Genepix 4200A (Axon Instruments, Sunnyvale, CA) to visualize and record the results. Data were extracted by GenePix Pro 6.0 from the microarray images. Protein interaction networks of the candidates proteins were built automatically by the STRING (Search Tool for the Retrieval of Interacting Genes/Proteins) system (<http://string-db.org/>). A network of protein-protein interactions was generated, visualized by Cytoscape v2.8.1 (<http://www.cytoscape.org>), and further analyzed for densely connected regions using a graph theoretic clustering algorithm "Molecular Complex Detection" (MCODE) [24].

### **Molecular docking analysis**

Molecule docking was carried out by the program Autodock Vina [61]. The SH2 domain of STAT3 from the complex crystal structure (PDB code: 1BG1) was used as receptor. Both receptor and ligand 6-OAP were prepared by AutoDock Tools [62]. The Autodock Vina exhaustiveness parameter and num\_modes were set as 50 and 100, respectively.

### **Immunoprecipitation and streptavidin agarose affinity assay**

Cell pellets were lysed in NETN lysis buffer containing 50 mM Tris HCL (pH 7.4), 137 mM NaCl, 1% NP40, 2mM EDTA and protease inhibitors cocktail (Sigma). For immunoprecipitations, cells were lysed on ice for 30 minutes in NETN buffer. Lysates were

centrifuged, the supernatant was incubated with indicated antibodies overnight at 4°C, after which protein A/G Plus beads (Santa Cruz Biotechnology) were added and incubated at 4°C for 4 h. The beads were washed 4 times in NETN buffer. Then the beads were resuspended in SDS-PAGE loading buffer and boiled for 5 min. Equal amounts of protein samples were separated by SDS-PAGE, transferred to nitrocellulose and immunoblotted with antibodies indicated. For Streptavidin agarose affinity assay, cells upon Bio-6-OAP were lysed, the cell lysates in NETN buffer were incubated with streptavidin agarose overnight at 4°C, then washed with lysis buffer and boiled in SDS-PAGE loading buffer. For 6-OAP competition, the cell lysates were pretreated with 6-OAP (100  $\mu$ M) for 1 hour, followed by 50  $\mu$ M Bio-6-OAP treatment for 3 hours at 4°C, and streptavidin agarose affinity assay were performed. Western blot assays were performed as described with indicated antibodies.

### **Luciferase reporter assays**

A549 cells were cotransfected with the reporter plasmid pAPRE-luc (containing the STAT3 responsive element, a gift kindly provided by Professor Zhijie Chang (University of Tsinghua, Beijing, China) and the internal control plasmid pRL-CMV with lipofectamine 2000 (Invitrogen, Frederick, MD, USA) according to the manufacturer's protocol. The cells were treated with IL-6 and 6-OAP for 24 hours, then firefly and Renilla luciferase activities were measured using the Dual-Luciferase Reporter Assay system (Promega, Fitchburg, WI, USA), and the relative reporter activity was normalized to the Renilla luciferase activity. Each assay was repeated in three independent experiments.

### **Murine models**

The animal studies were approved by the Institutional Review Board of Institute of Zoology, Chinese Academy of Sciences. All animal studies were conducted according to protocols approved by the Animal Ethics Committee of our institute. SCID mice (5–6 weeks old) were purchased from Vital River Laboratory Animal Technology (Beijing, China). The mice were injected with A549-luciferase cells ( $1 \times 10^6$ ) via tail vein, and randomized into 2 groups a week later to receive vehicle or 6-OAP treatment (10 mg/kg, once every two days for 30 days). The mice were imaged by the IVIS Spectrum In Vivo Imaging System (PerkinElmer, Waltham, MA, USA) at day 40, and were euthanized by cervical dislocation when they became moribund.

### **Statistical analysis**

All experiments were repeated at least three times and the data are presented as the mean  $\pm$  SD unless noted otherwise. Differences between data groups were

evaluated for significance using student t-test of unpaired data or one-way analysis of variance and Bonferroni post-test. The overall survival data of the patients were obtained from a database at <http://kmplot.com/analysis/index.php?p=service&cancer=lung>, and the survival curves were plotted according to Kaplan-Meier method and compared by log-rank test. P values <0.05 were considered statistically significant.

## ACKNOWLEDGMENTS

This work was supported by the National Natural Science Funds for Distinguished Young Scholar (81425025), the National Key Research and Development Program of China (2016YFC0905500), the National Natural Science Foundation of China (81672765, 81171925 and 81201537), and grants from the State Key Laboratory of Medical Genomics. The funders had no role in study design, data collection and analysis, decision to publish, or preparation of the manuscript.

## CONFLICTS OF INTEREST

No potential conflicts of interest were disclosed.

## Author contributions

Conceived and designed the experiments: Zhou GB. Performed the experiments: Cheng X, Liu YQ, Wang GZ, Yang LN, Li XC, Zhou B, Qu LW, and Wang XL. Molecular docking analysis: Liu J, Lu YZ. Analyzed the data: Zhou GB, Tao SC, Liu JS. Wrote the paper: Zhou GB. Contributed reagents: Cheng YX.

## REFERENCES

1. Network TCGAR. Comprehensive molecular profiling of lung adenocarcinoma. *Nature*. 2014; 511:543-550.
2. Network. TCGAR. Comprehensive genomic characterization of squamous cell lung cancers. *Nature*. 2012; 489:519-525.
3. Yu XJ, Yang MJ, Zhou B, Wang GZ, Huang YC, Wu LC, Cheng X, Wen ZS, Huang JY, Zhang YD, Gao XH, Li GF, He SW, Gu ZH, Ma L, Pan CM, et al. Characterization of somatic mutations in air pollution-related lung cancer. *EBioMedicine*. 2015; 2:583-590.
4. Torre LA, Bray F, Siegel RL, Ferlay J, Lortet-Tieulent J and Jemal A. Global cancer statistics, 2012. *CA: A Cancer J Clin*. 2015; 65:87-108.
5. Lynch TJ, Bell DW, Sordella R, Gurubhagavatula S, Okimoto RA, Brannigan BW, Harris PL, Haserlat SM, Supko JG, Haluska FG, Louis DN, Christiani DC, Settleman J and Haber DA. Activating Mutations in the Epidermal Growth Factor Receptor Underlying Responsiveness of Non-Small-Cell Lung Cancer to Gefitinib. *N Engl J Med*. 2004; 350:2129-2139.
6. Shepherd FA, Rodrigues Pereira J, Ciuleanu T, Tan EH, Hirsh V, Thongprasert S, Campos D, Maoleekoonpiroj S, Smylie M, Martins R, van Kooten M, Dediu M, Findlay B, Tu D, Johnston D, Bezjak A, et al. Erlotinib in Previously Treated Non-Small-Cell Lung Cancer. *N Engl J Med*. 2005; 353:123-132.
7. Kobayashi S, Boggon TJ, Dayaram T, Janne PA, Kocher O, Meyerson M, Johnson BE, Eck MJ, Tenen DG and Halmos B. EGFR mutation and resistance of non-small-cell lung cancer to gefitinib. *N Engl J Med*. 2005; 352:786-792.
8. Borghaei H, Paz-Ares L, Horn L, Spigel DR, Steins M, Ready NE, Chow LQ, Vokes EE, Felip E, Holgado E, Barlesi F, Kohlhäufel M, Arrieta O, Burgio MA, Fayette J, Lena H, et al. Nivolumab versus Docetaxel in Advanced Nonsquamous Non-Small-Cell Lung Cancer. *N Engl J Med*. 2015; 373:1627-1639.
9. Brahmer J, Reckamp KL, Baas P, Crinò L, Eberhardt WEE, Poddubskaya E, Antonia S, Pluzanski A, Vokes EE, Holgado E, Waterhouse D, Ready N, Gainor J, Arén Frontera O, Havel L, Steins M, et al. Nivolumab versus Docetaxel in Advanced Squamous-Cell Non-Small-Cell Lung Cancer. *N Engl J Med*. 2015; 373:123-135.
10. Petrelli A and Giordano S. From single- to multi-target drugs in cancer therapy: when aspecificity becomes an advantage. *Curr Med Chem*. 2008; 15:422-432.
11. Chabner BA and Roberts TG, Jr. Timeline: Chemotherapy and the war on cancer. *Nat Rev Cancer*. 2005; 5:65-72.
12. Mi JQ, Chen SJ, Zhou GB, Yan XJ and Chen Z. Synergistic targeted therapy for acute promyelocytic leukaemia: a model of translational research in human cancer. *J Intern Med*. 2015;278: 627-642.
13. Zhang HN, Yang L, Ling JY, Czajkowsky DM, Wang JF, Zhang XW, Zhou YM, Ge F, Yang MK, Xiong Q, Guo SJ, Le HY, Wu SF, Yan W, Liu B, Zhu H, et al. Systematic identification of arsenic-binding proteins reveals that hexokinase-2 is inhibited by arsenic. *Proc Natl Acad Sci U S A*. 2015; 112:15084-15089.
14. Vodermaier HC. APC/C and SCF: Controlling Each Other and the Cell Cycle. *Curr Biol*. 2004; 14:R787-R796.
15. Schmidt M and Bastians H. Mitotic drug targets and the development of novel anti-mitotic anticancer drugs. *Drug Resist Updat*. 2007; 10:162-181.
16. Kaestner P and Bastians H. Mitotic drug targets. *J Cell Biochem*. 2010; 111:258-265.
17. Huang HC, Shi J, Orth JD and Mitchison TJ. Evidence that mitotic exit is a better cancer therapeutic target than spindle assembly. *Cancer Cell*. 2009; 16:347-358.
18. Sackton KL, Dimova N, Zeng X, Tian W, Zhang M, Sackton TB, Meaders J, Pfaff KL, Sigoillot F, Yu H, Luo X and King RW. Synergistic blockade of mitotic exit by two chemical inhibitors of the APC/C. *Nature*. 2014; 514:646-649.
19. Chan CH, Morrow J, Li CF, Gao Y, Jin G, Moten A, Stagg L, Ladbury J, Cai Z, Xu D, Logothetis C, Hung MC, Zhang S and Lin HK. Pharmacological Inactivation of Skp2 SCF Ubiquitin Ligase Restricts Cancer Stem Cell Traits and Cancer Progression. *Cell*. 2013; 154:556-568.



20. Liu YQ, Wang XL, Cheng X, Lu YZ, Wang GZ, Li XC, Zhang J, Wen ZS, Huang ZL, Gao QL, Yang LN, Cheng YX, Tao SC, et al. Skp1 in lung cancer: Clinical significance and therapeutic efficacy of its small molecule inhibitors. *Oncotarget*. 2015; 6:34953-34967. doi: 10.18632/oncotarget.5547.
21. Liu Y, Chen XQ, Liang HX, Zhang FX, Zhang B, Jin J, Chen YL, Cheng YX and Zhou GB. Small Compound 6-*O*-Angeloylplenolin Induces Mitotic Arrest and Exhibits Therapeutic Potentials in Multiple Myeloma. *PLoS ONE*. 2011; 6:e21930.
22. Jeong JS, Jiang L, Albino E, Marrero J, Rho HS, Hu J, Hu S, Vera C, Bayron-Poueymiroy D, Rivera-Pacheco ZA, Ramos L, Torres-Castro C, Qian J, Bonaventura J, Boeke JD, Yap WY, et al. Rapid Identification of Monospecific Monoclonal Antibodies Using a Human Proteome Microarray. *Mol Cell Proteomics*. 2012; 11:O111.016253.
23. Huang DW, Sherman BT and Lempicki RA. Systematic and integrative analysis of large gene lists using DAVID bioinformatics resources. *Nat Protocols*. 2008; 4:44-57.
24. Bader GD and Hogue CW. An automated method for finding molecular complexes in large protein interaction networks. *BMC Bioinformatics*. 2003; 4:2.
25. Darnell JE, Jr., Kerr IM and Stark GR. Jak-STAT pathways and transcriptional activation in response to IFNs and other extracellular signaling proteins. *Science*. 1994; 264:1415-1421.
26. Siddiquee K, Zhang S, Guida WC, Blaskovich MA, Greedy B, Lawrence HR, Yip MLR, Jove R, McLaughlin MM, Lawrence NJ, Sebt SM and Turkson J. Selective chemical probe inhibitor of Stat3, identified through structure-based virtual screening, induces antitumor activity. *Proc Natl Acad Sci U S A*. 2007; 104:7391-7396.
27. Minami M, Inoue M, Wei S, Takeda K, Matsumoto M, Kishimoto T and Akira S. STAT3 activation is a critical step in gp130-mediated terminal differentiation and growth arrest of a myeloid cell line. *Proc Natl Acad Sci U S A*. 1996; 93:3963-3966.
28. Chai E ZP, Shanmugam MK, Arfuso F, Dharmarajan A, Wang C, Kumar AP, Samy RP, Lim LHK, Wang L, Goh BC, Ahn KS, Hui KM and Sethi G. Targeting transcription factor STAT3 for cancer prevention and therapy. *Pharmacol Ther*. 2016; 162:86-97.
29. Nakajima K, Matsuda T, Fujitani Y, Kojima H, Yamanaka Y, Nakae K, Takeda T and Hirano T. Signal transduction through IL-6 receptor: involvement of multiple protein kinases, stat factors, and a novel H7-sensitive pathway. *Ann N Y Acad Sci*. 1995; 762:55-70.
30. Guo G, Gui Y, Gao S, Tang A, Hu X, Huang Y, Jia W, Li Z, He M, Sun L, Song P, Sun X, Zhao X, Yang S, Liang C, Wan S, et al. Frequent mutations of genes encoding ubiquitin-mediated proteolysis pathway components in clear cell renal cell carcinoma. *Nat Genet*. 2012; 44:17-19.
31. Talbot SG, Estilo C, Maghami E, Sarkaria IS, Pham DK, O-charoenrat P, Succi ND, Ngai I, Carlson D, Ghossein R, Viale A, Park BJ, Rusch VW and Singh B. Gene Expression Profiling Allows Distinction between Primary and Metastatic Squamous Cell Carcinomas in the Lung. *Cancer Res*. 2005; 65:3063-3071.
32. Okayama H, Kohno T, Ishii Y, Shimada Y, Shiraishi K, Iwakawa R, Furuta K, Tsuta K, Shibata T, Yamamoto S, Watanabe S-i, Sakamoto H, Kumamoto K, Takenoshita S, Gotoh N, Mizuno H, et al. Identification of Genes Upregulated in ALK-Positive and EGFR/KRAS/ALK-Negative Lung Adenocarcinomas. *Cancer Res*. 2012; 72:100-111.
33. Selamat SA, Chung BS, Girard L, Zhang W, Zhang Y, Campan M, Siegmund KD, Koss MN, Hagen JA, Lam WL, Lam S, Gazdar AF and Laird-Offringa IA. Genome-scale analysis of DNA methylation in lung adenocarcinoma and integration with mRNA expression. *Genome Res*. 2012; 22:1197-1211.
34. Györfy B, Surowiak P, Budczies J and Lanczky A. Online Survival Analysis Software to Assess the Prognostic Value of Biomarkers Using Transcriptomic Data in Non-Small-Cell Lung Cancer. *PLoS ONE*. 2013; 8:e82241.
35. Hou J, Aerts J, den Hamer B, van Ijcken W, den Bakker M, Riegman P, van der Leest C, van der Spek P, Foekens JA, Hoogsteden HC, Grosveld F and Philipson S. Gene Expression-Based Classification of Non-Small Cell Lung Carcinomas and Survival Prediction. *PLoS ONE*. 2010; 5:e10312.
36. Beer DG, Kardia SLR, Huang C-C, Giordano TJ, Levin AM, Misek DE, Lin L, Chen G, Gharib TG, Thomas DG, Lizyness ML, Kuick R, Hayasaka S, Taylor JMG, Iannettoni MD, Orringer MB, et al. Gene-expression profiles predict survival of patients with lung adenocarcinoma. *Nat Med*. 2002; 8:816-824.
37. Garber ME, Troyanskaya OG, Schluens K, Petersen S, Thaesler Z, Pacyna-Gengelbach M, van de Rijn M, Rosen GD, Perou CM, Whyte RI, Altman RB, Brown PO, Botstein D and Petersen I. Diversity of gene expression in adenocarcinoma of the lung. *Proc Natl Acad Sci U S A*. 2001; 98:13784-13789.
38. Su L-J, Chang C-W, Wu Y-C, Chen K-C, Lin C-J, Liang S-C, Lin C-H, Whang-Peng J, Hsu S-L, Chen C-H and Huang C-YF. Selection of DDX5 as a novel internal control for Q-RT-PCR from microarray data using a block bootstrap re-sampling scheme. *BMC Genomics*. 2007; 8:140-140.
39. Landi MT, Dracheva T, Rotunno M, Figueroa JD, Liu H, Dasgupta A, Mann FE, Fukuoka J, Hames M, Bergen AW, Murphy SE, Yang P, Pesatori AC, Consonni D, Bertazzi PA, Wacholder S, et al. Gene Expression Signature of Cigarette Smoking and Its Role in Lung Adenocarcinoma Development and Survival. *PLoS ONE*. 2008; 3:e1651.
40. Wake MS and Watson CJ. STAT3 the oncogene – still eluding therapy? *FEBS J*. 2015; 282:2600-2611.
41. Zhong Z, Wen Z and Darnell J. Stat3: a STAT family member activated by tyrosine phosphorylation in response to epidermal growth factor and interleukin-6. *Science*. 1994; 264:95-98.



42. Bromberg JF, Wrzeszczynska MH, Devgan G, Zhao Y, Pestell RG, Albanese C and Darnell JE, Jr. Stat3 as an oncogene. *Cell*. 1999; 98:295-303.
43. Lin L, Liu A, Peng Z, Lin HJ, Li PK, Li C and Lin J. STAT3 is necessary for proliferation and survival in colon cancer-initiating cells. *Cancer Res*. 2011; 71:7226-7237.
44. Chang Q, Bournazou E, Sansone P, Berishaj M, Gao SP, Daly L, Wels J, Theilen T, Granitto S, Zhang X, Cotari J, Alpaugh ML, de Stanchina E, Manova K, Li M, Bonafe M, et al. The IL-6/JAK/Stat3 feed-forward loop drives tumorigenesis and metastasis. *Neoplasia*. 2013; 15:848-862.
45. Watson CJ and Miller WR. Elevated levels of members of the STAT family of transcription factors in breast carcinoma nuclear extracts. *Br J Cancer*. 1995; 71:840-844.
46. Weber-Nordt RM, Egen C, Wehinger J, Ludwig W, Gouilleux-Gruart V, Mertelsmann R and Finke J. Constitutive activation of STAT proteins in primary lymphoid and myeloid leukemia cells and in Epstein-Barr virus (EBV)-related lymphoma cell lines. *Blood*. 1996; 88:809-816.
47. Catlett-Falcone R, Landowski TH, Oshiro MM, Turkson J, Levitzki A, Savino R, Ciliberto G, Moscinski L, Fernández-Luna JL, Nuñez G, Dalton WS and Jove R. Constitutive Activation of Stat3 Signaling Confers Resistance to Apoptosis in Human U266 Myeloma Cells. *Immunity*. 1999; 10:105-115.
48. Kanda N, Seno H, Konda Y, Marusawa H, Kanai M, Nakajima T, Kawashima T, Nanakin A, Sawabu T, Uenoyama Y, Sekikawa A, Kawada M, Suzuki K, Kayahara T, Fukui H, Sawada M, et al. STAT3 is constitutively activated and supports cell survival in association with survivin expression in gastric cancer cells. *Oncogene*. 2004; 23:4921-4929.
49. Corvinus FM, Orth C, Moriggl R, Tsareva SA, Wagner S, Pfitzner EB, Baus D, Kaufmann R, Huber LA, Zatloukal K, Beug H, Ohlschlager P, Schutz A, Halbhuber KJ and Friedrich K. Persistent STAT3 activation in colon cancer is associated with enhanced cell proliferation and tumor growth. *Neoplasia*. 2005; 7:545-555.
50. Yakata Y, Nakayama T, Yoshizaki A, Kusaba T, Inoue K and Sekine I. Expression of p-STAT3 in human gastric carcinoma: significant correlation in tumour invasion and prognosis. *Int J Oncol*. 2007; 30:437-442.
51. Zhang X, Liu P, Zhang B, Mao H, Shen L and Ma Y. Inhibitory effects of STAT3 decoy oligodeoxynucleotides on human epithelial ovarian cancer cell growth in vivo. *Int J Mol Med*. 2013; 32:623-628.
52. Gao SP, Mark KG, Leslie K, Pao W, Motoi N, Gerald WL, Travis WD, Bornmann W, Veach D, Clarkson B and Bromberg JF. Mutations in the EGFR kinase domain mediate STAT3 activation via IL-6 production in human lung adenocarcinomas. *J Clin Invest*. 2007; 117:3846-3856.
53. Haura EB, Zheng Z, Song L, Cantor A and Bepler G. Activated Epidermal Growth Factor Receptor-Stat-3 Signaling Promotes Tumor Survival In vivo in Non-Small Cell Lung Cancer. *Clin Cancer Res*. 2005; 11:8288-8294.
54. Zheng N, Zhou Q, Wang Z and Wei W. Recent advances in SCF ubiquitin ligase complex: Clinical implications. *Biochim Biophys Acta*. 2016; 1866:12-22.
55. Mertins P, Mani DR, Ruggles KV, Gillette MA, Clauser KR, Wang P, Wang X, Qiao JW, Cao S, Petralia F, Kawaler E, Mundt F, Krug K, Tu Z, Lei JT, Gatza ML, et al. Proteogenomics connects somatic mutations to signalling in breast cancer. *Nature*. 2016; 534:55-62.
56. Gorelik M, Orlicky S, Sartori MA, Tang X, Marcon E, Kurinov I, Greenblatt JF, Tyers M, Moffat J, Sicheri F and Sidhu SS. Inhibition of SCF ubiquitin ligases by engineered ubiquitin variants that target the Cul1 binding site on the Skp1-F-box interface. *Proc Natl Acad Sci U S A*. 2016; 113:3527-3532.
57. Hussain M, Lu Y, Liu Y-Q, Su K, Zhang J, Liu J and Zhou G-B. Skp1: Implications in cancer and SCF-oriented anti-cancer drug discovery. *Pharmacol Res*. 2016; 111:34-42.
58. Taylor RS and Towers GH. Antibacterial constituents of the Nepalese medicinal herb, *Centipeda minima*. *Phytochemistry*. 1998; 47:631-634.
59. Ding LF, Liu Y, Liang HX, Zhou DP, Zhou GB and Cheng YX. Two new terpene glucosides and antitumor agents from *Centipeda minima*. *J Asian Nat Prod Res*. 2009; 11:732-736.
60. Carmichael J, Mitchell JB, DeGraff WG, Gamson J, Gazdar AF, Johnson BE, Glatstein E and Minna JD. Chemosensitivity testing of human lung cancer cell lines using the MTT assay. *Br J Cancer*. 1988; 57:540-547.
61. Trott O and Olson AJ. AutoDock Vina: Improving the speed and accuracy of docking with a new scoring function, efficient optimization, and multithreading. *J Comput Chem*. 2010; 31:455-461.
62. Sanner MF. Python: a programming language for software integration and development. *J Mol Graph Model*. 1999; 17:57-61.
